# Supplementary material for: Association of Reactogenicity with Immunogenicity of the ChAdOx1 nCoV-19 Vaccine in Patients Undergoing Hemodialysis
Source: MDPI journal article supplement (doi:10.3390/vaccines10081366), 2022-08-21

## **Supplementary Table of Contents**

Supplementary Table S1. Immune responses (median and interquartile range) in hemodialysis patients according to reactogenicity

Supplementary Figure S1. Distribution of the symptom score.

Supplementary Figure S2. Correlations between SARS-CoV-2 anti-spike IgG antibody concentrations and neutralizing antibody titers.

Supplementary Table S1. Immune responses (median and interquartile range) in hemodialysis patients according to reactogenicity

| <b>Reactogenicity</b>                     | <b>Yes</b>          | <b>No</b>         | <b><i>P</i> value</b> |
|-------------------------------------------|---------------------|-------------------|-----------------------|
| <b>Local reaction</b>                     | <i>n</i> =80        | <i>n</i> =126     |                       |
| Anti-spike antibody (AU/mL)               | 243.0 (77.5–538.1)  | 117.5 (2.8–472.3) | 0.025                 |
| Neutralizing antibody (NT <sub>50</sub> ) | 1.71 (1.11–3.00)    | 1.26 (0.91–2.62)  | 0.158                 |
| <b>Systemic reaction</b>                  | <i>n</i> =119       | <i>n</i> =87      |                       |
| Anti-spike antibody (AU/mL)               | 224.8 (38.9–542.5)  | 69.5 (2.6–384.4)  | 0.026                 |
| Neutralizing antibody (NT <sub>50</sub> ) | 1.72 (1.09–3.01)    | 1.21 (0.90–2.52)  | 0.043                 |
| <b>Fever</b>                              | <i>n</i> =60        | <i>n</i> =146     |                       |
| Anti-spike antibody (AU/mL)               | 267.4 (108.6–661.2) | 131.8 (3.0–411.5) | 0.014                 |
| Neutralizing antibody (NT <sub>50</sub> ) | 1.99 (1.16–3.07)    | 1.26 (0.91–2.47)  | 0.017                 |
| <b>Symptom score &gt;1</b>                | <i>n</i> =82        | <i>n</i> =124     |                       |
| Anti-spike antibody (AU/mL)               | 272.5 (102.3–654.9) | 113.1 (1.0–439.2) | 0.003                 |
| Neutralizing antibody (NT <sub>50</sub> ) | 1.73 (1.11–3.14)    | 1.24 (0.90–2.56)  | 0.045                 |

AU, arbitrary unit; NT<sub>50</sub>, 50% neutralizing titer.

Supplementary Figure S1. Distribution of the symptom score.

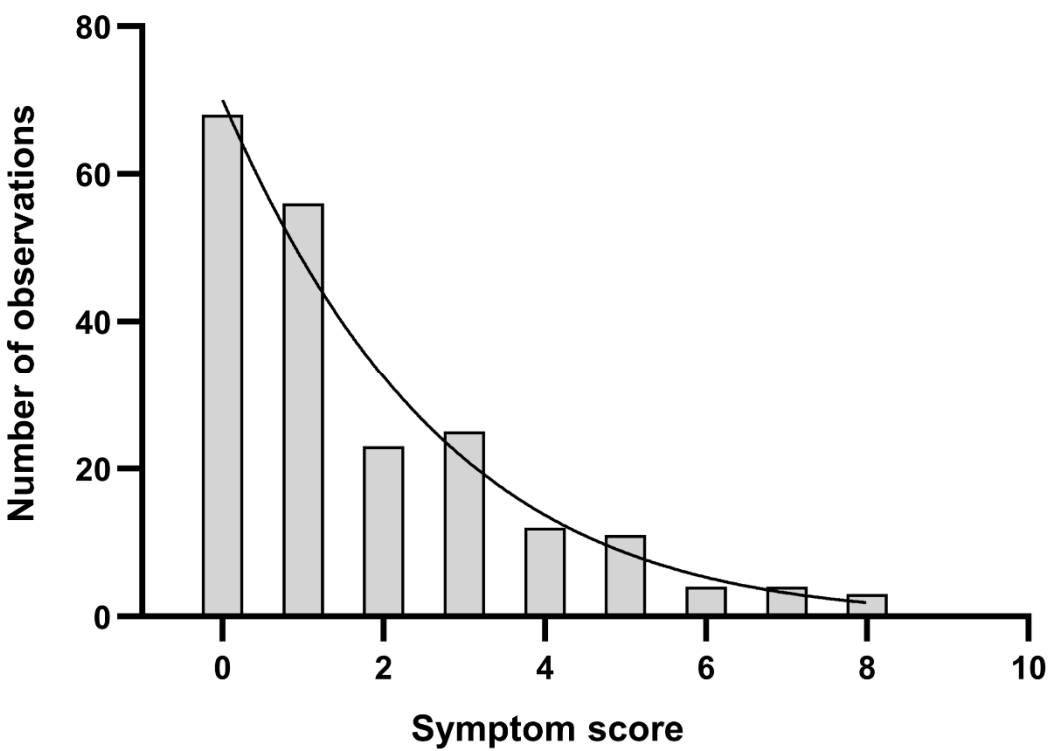

Supplementary Figure S2. Correlations between SARS-CoV-2 anti-spike IgG antibody concentrations and neutralizing antibody titers.

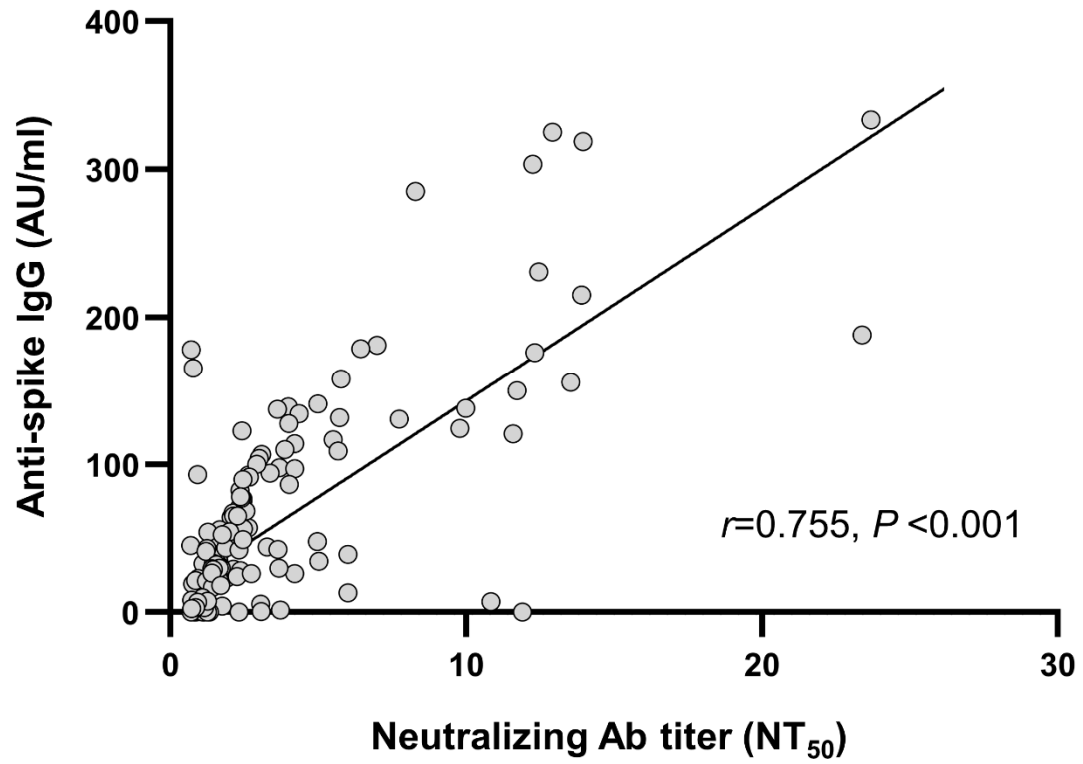

Supplement: s1 [file s1]
